# Supplementary material for: Plastome evolution in the East Asian lobelias (Lobelioideae) using phylogenomic and comparative analyses
Source: Front Plant Sci. 2023 Mar 31;14:1144406. doi: 10.3389/fpls.2023.1144406 (PMC10102522; doi:10.3389/fpls.2023.1144406)
Supplement: Supplementary file 4 [file Table_3.xlsx]

## Sheet: Sheet1
Table S3 Three typical ORFs showing in the plastid genomes of East Asian lobelias.
Species	Region	Name	Start of location	End of location	Length	Direction
Lobelia chinensis	rps16-trnQ(UUG)(frame 3)	ORF 192	12327	11749	579	reverse
	ndhC-psaI(frame 1)	ORF 227	56803	57486	684	forward
	rpoB-trnC(GCA)(frame 2)	ORF 298	33638	32742	897	reverse
L. clavata	rps16-trnQ(UUG) (frame 1)	ORF 191	12357	11782	576	reverse
	ndhC-psaI (frame 2)	ORF 256	57366	58036	771	forward
	rpoB-trnC(GCA)(frame 3)	ORF 231	32975	33670	696	reverse
L. colorata	rps16-trnQ(UUG)(frame 3)	ORF 195	12371	11784	588	reverse
	ndhC-psaI (frame 1)	ORF 227	57621	58304	684	forward
	rpoB-trnC(GCA)(frame 2)	ORF 148	34104	33658	447	reverse
L. davidii	rps16-trnQ(UUG)(frame 3)	ORF 221	12455	11784	672	reverse
	ndhC-psaI (frame 3)	ORF 227	57672	58355	654	forward
	rpoB-trnC(GCA)(frame 2)	ORF 208	33861	33235	627	reverse
L. doniana	rps16-trnQ(UUG)(frame 1)	ORF 238	12608	11889	720	reverse
	ndhC-psaI (frame 3)	ORF 227	57381	58064	684	forward
	rpoB-trnC(GCA)(frame 1)	ORF 231	33722	33027	696	reverse
L. erectiuscula	rps16-trnQ(UUG)(frame 1)	ORF 191	12353	11778	576	reverse
	ndhC-psaI (frame 2)	ORF 227	57356	58039	684	forward
	rpoB-trnC(GCA)(frame 3)	ORF 231	33768	33073	696	reverse
L. iteophylla	rps16-trnQ(UUG)(frame 2)	ORF 208	12409	11783	627	reverse
	ndhC-psaI (frame 3)	ORF 227	57405	58088	684	forward
	rpoB-trnC(GCA)(frame 2)	ORF 286	33925	33065	861	reverse
L. melliana	rps16-trnQ(UUG)(frame 1)	ORF 202	12309	11701	609	reverse
	ndhC-psaI (frame 1)	ORF 228	56944	57630	687	forward
	rpoB-trnC(GCA)(frame 2)	ORF 306	33806	32886	921	reverse
L. montana	rps16-trnQ(UUG)(frame 3)	ORF 223	12365	11694	672	reverse
	ndhC-psaI (frame 1)	ORF 227	57517	58200	684	forward
	rpoB-trnC(GCA)(frame 3)	ORF 330	34211	33219	993	reverse
L. pleotricha	rps16-trnQ(UUG)(frame 2)	ORF 191	12477	11902	576	reverse
	ndhC-psaI (frame 3)	ORF 227	57183	57866	684	forward
	rpoB-trnC(GCA)(frame 2)	ORF 151	33825	33370	456	reverse
L. pyramidalis_S11387	rps16-trnQ(UUG)(frame 3)	ORF 193	12113	11539	582	reverse
	ndhC-psaI (frame 1)	ORF 226	56896	57576	681	forward
	rpoB-trnC(GCA)(frame 3)	ORF 304	33572	32658	915	reverse
L. pyramidalis_S13267	rps16-trnQ(UUG)(frame 1)	ORF 195	12361	11774	588	reverse
	ndhC-psaI (frame 2)	ORF 227	57389	58072	684	forward
	rpoB-trnC(GCA)(frame 1)	ORF 304	33970	33056	915	reverse
L. seguinii	rps16-trnQ(UUG)(frame 2)	ORF 195	12370	11783	588	reverse
	ndhC-psaI (frame 2)	ORF 227	57956	58639	684	forward
	rpoB-trnC(GCA)(frame 1)	ORF 208	34145	33519	627	reverse
L. sessilifolia	rps16-trnQ(UUG)(frame 1)	ORF 242	12495	11767	729	reverse
	ndhC-psaI (frame 1)	ORF 264	56821	57615	795	forward
	rpoB-trnC(GCA)(frame 2)	ORF 179	33776	33237	540	reverse
L. taliensis	rps16-trnQ(UUG)(frame 3)	ORF 229	12579	11890	690	reverse
	ndhC-psaI (frame 3)	ORF 227	57285	57968	684	forward
	rpoB-trnC(GCA)(frame 1)	ORF 159	33569	33090	480	reverse
Pratia angulata	rps16-trnQ(UUG)(frame 1)	ORF 192	12329	11751	579	reverse
	ndhC-psaI (frame 1)	ORF 224	56545	57219	675	forward
	rpoB-trnC(GCA)(frame 1)	ORF 240	33602	32880	723	reverse
P. nummularia_MF061203	rps16-trnQ(UUG)(frame 2)	ORF 208	12397	11771	627	reverse
	ndhC-psaI (frame 1)	ORF 227	56716	57399	684	forward
	rpoB-trnC(GCA)(frame 3)	ORF 244	33651	32917	735	reverse
P. nummularia_S08798	rps16-trnQ(UUG)(frame 1)	ORF 192	12464	11886	579	reverse
	ndhC-psaI (frame 3)	ORF 227	56841	57524	684	forward
	rpoB-trnC(GCA)(frame 1)	ORF 244	33719	32985	735	reverse
