# Supplementary material for: Plastome evolution in the East Asian lobelias (Lobelioideae) using phylogenomic and comparative analyses
Source: Front Plant Sci. 2023 Mar 31;14:1144406. doi: 10.3389/fpls.2023.1144406 (PMC10102522; doi:10.3389/fpls.2023.1144406)
Supplement: Supplementary file 7 [file Table_6.xlsx]

## Sheet: Sheet1
Table S6 Maximum likelihood parameter estimates for the 63 genes of Lobelioceae species based on site-specific model.
Gene	Model	L	np	Estimates of parameters		Highly positively selected sites
atpA	model0	-8226.88	168	omega (dN/dS) = 0.07786
	model1	-8226.88	169	p: 0.91711 0.082890	w: 0.02348 1.00000
	model2	-8055.407852	171	p: 0.91716 0.08209 0.00075	w: 0.02354 1.00000 3.12023
	model3	-8039.08	172	p: 0.82660 0.12517 0.04822	w: 0.00815 0.24314 0.93901
	model7	-8078.68	169	p = 0.04283 q = 0.24474
	model8	-8042.783900	171	p0 = 0.95642 p = 0.12281 q = 2.47661	(p1 = 0.04358) w = 1.00000	452 G 0.990**
atpB	model0	-7595.91	168	omega (dN/dS) = 0.05509
	model1	-7515.49	169	p: 0.95141 0.04859	w: 0.02544 1.00000
	model2	-7515.49	171	p: 0.95141 0.04859 0.00000	w: 0.02544 1.00000 9.98876
	model3	-7506.55	172	p: 0.91827 0.08173 0.00000	w: 0.01708 0.51996 11.53987
	model7	-7527.41	169	p = 0.03923 q = 0.25863
	model8	-7505.37	171	p0 = 0.97979 p = 0.13817 q = 2.83703	(p1 = 0.02021) w = 1.00000
atpE	model0	-2457.94	168	omega (dN/dS) = 0.16489
	model1	-2417.32	169	p: 0.82434 0.17566	w: 0.06536 1.00000
	model2	-2417.32	171	p: 0.82434 0.12078 0.05488	w: 0.06536 1.00000 1.00000
	model3	-2407.09	172	p: 0.68719 0.30487 0.00794	w: 0.02564 0.46891 3.00283	104 R 1.000**
	model7	-2413.43	169	p = 0.22790 q = 0.83503
	model8	-2407.1	171	p0 = 0.96165 p = 0.27372 q = 1.62900	(p1 = 0.03835) w = 1.00000	104 R 1.000**
atpF	model0	-3537.58	168	omega (dN/dS) = 0.38744
	model1	-3534.29	169	p: 0.69159 0.30841	w: 0.146030 1.00000
	model2	-3534.29	171	p: 0.67879 0.29685 0.02437	w: 0.15320 1.00000 2.77787
	model3	-3530.55	172	p: 0.44265 0.50297 0.05438	w: 0.05323 0.54621 2.08757
	model7	-3536.898202	169	p = 0.32123 q = 0.48545
	model8	-3530.38	171	p0 = 0.80179 p = 0.74458 q = 2.65704	(p1 = 0.19821) w = 1.00000	109 N 0.990**
atpH	model0	-1012.49	168	omega (dN/dS) = 0.02060
	model1	-1015.09	169	p: 0.96413 0.03587	w: 0.00095 1.00000
	model2	-1015.09	171	p: 0.96413 0.03587 0.00000	w: 0.00095 1.00000 26.59290
	model3	-1012.49	172	p: 0.95091 0.04909 0.00000	w: 0.00000 0.40196 70.45153
	model7	-1017.88	169	p = 0.03852 q = 0.36621
	model8	-1013.34	171	p0 = 0.99999 p = 0.00502 q = 0.10304	(p1 = 0.00001) w = 1.00000
atpI	model0	-4012.84	168	omega (dN/dS) = 0.11671
	model1	-3922.33	169	p: 0.86870 0.13130	w: 0.02502 1.00000
	model2	-3910.72	171	p: 0.86676 0.12916 0.00408	w: 0.02538 1.00000 7.42130	123 H 1.000**
	model3	-3903.16	172	p: 0.82342 0.17250 0.00408	w: 0.01427 0.57551 6.66175
	model7	-3929.66	169	p = 0.10471 q = 0.48162
	model8	-3909.32	171	p0 = 0.96020 p = 0.11855 q = 1.33166	(p1 = 0.03980) w = 1.00000	123 H 1.000**
ccsA	model0	-9689.21	168	omega (dN/dS) = 0.32859
	model1	-9401.36	169	p: 0.69069 0.30931	w: 0.10253 1.00000
	model2	-9401.36	171	p: 0.69069 0.09321 0.21610	w: 0.10253 1.00000 1.00000
	model3	-9384.15	172	p: 0.53030 0.27522 0.19448	w: 0.05631 0.37706 1.21033
	model7	-9393.48	169	p = 0.16884 q = 0.26584
	model8	-9381.77	171	p0 = 0.77560 p = 0.67868 q = 3.97457	(p1 = 0.22440) w = 1.00000
cemA	model0	-5989.37	168	omega (dN/dS) = 0.49263
	model1	-5903.6	169	p: 0.56365 0.43635	w: 0.17223 1.00000
	model2	-5882.16	171	p: 0.53458 0.44808 0.01734	w: 0.17183 1.00000 5.46660	40 A 1.000**	108 L 1.000**
	model3	-5880.69	172	p: 0.48921 0.49165 0.01913	w: 0.13924 0.83873 4.87896
	model7	-5902.57	169	p = 0.54012 q = 0.55310
	model8	-5880.07	171	p0 = 0.73058 p = p=1.05705 q = 2.78305	(p1 = 0.26942) w = 1.00000	40 A 1.000**	108 L 1.000**
clpP	model0	-3471.35	168	omega (dN/dS) = 1.46379
	model1	-3430.04	169	p: 0.39823 0.60177	w: 0.28265 1.00000
	model2	-3389.269031	171	p: 0.27710 0.30951 0.41339	w: 0.46686 1.00000 2.98172	1 R 1.000**	2 P 1.000**	10 P 1.000**	12 G 0.994**	13 H 1.000**	22 A 0.999**	28 G 0.998**	30 R 1.000**	35 S 1.000**	38 F 0.997**	41 T 0.995**	44 T 0.994**	64 T 0.999**	65 D 0.999**
	model3	-3387.55	172	p: 0.40124 0.34539 0.25337	w: 0.57071 1.77102 3.85382
	model7	-3459.47	169	p = 0.06353 q = 0.07072
	model8	-3389.66	171	p0 = 0.40261 p = 39.8612 q = 99.00000	(p1 = 0.59739) w = 1.00000	1 R 1.000**	2 P 1.000**	10 P 1.000**	12 G 0.998**	13 H 1.000**	20 K 0.993**	22 A 1.000**	28 G 0.999**	30 R 1.000**	34 A 0.995**	35 S 1.000**	38 F 0.999**	40 A 0.995**	41 T 0.998**	44 T 0.997**	64 T 1.000**	65 D 1.000**
matK	model0	-13297.4	168	omega (dN/dS) = 0.67404
	model1	-13103.1	169	p: 0.51544 0.48456	w: 0.18953 1.00000
	model2	-13059.4	171	p: 0.45252 0.47775 0.06973	w: 0.18952 1.00000 3.18761	119 G 0.999**	315 D 1.000**	438 V 1.000**	249 L 0.992**	315 D 1.000**	329 S 0.996**	381 A 0.992**	438 V 1.000**
	model3	-4727	172	p: 0.22407 0.57845 0.19749	w: 0.04296 0.60672 2.07179
	model7	-4730.944540	169	p = 0.48317 q = 0.41607
	model8	-4727	171	p0 = 0.58265 p = 1.15928 q = 3.53488	(p1 = 0.11113) w = 2.55340	36 C 0.995**	119 G 0.999**	237 G 0.996**
petA	model0	-5602.1	168	omega (dN/dS) = 0.14084
	model1	-5533.67	171	p: 0.84629 0.15371	w: 0.05827 1.00000
	model2	-5533.67	171	p: 0.84630 0.15370 0.00000	w: 0.05827 1.00000 12.75033
	model3	-5519.64	172	p: 0.74839 0.24739 0.00422	w: 0.02761 0.50952 2.07671
	model7	-5523.1	169	p = 0.20624 q = 0.90605
	model8	-5521.72	171	p0 = 0.94783 p = 0.21542 q = 1.32829	(p1 = 0.05217) w = 1.00000
petB	model0	-2774.12	168	omega (dN/dS) = 0.03020
	model1	-2751.26	169	p: 0.97368 0.02632	w: 0.01436 1.00000
	model2	-2751.26	171	p: 0.97368 0.02632 0.00000	w: 0.01436 1.00000 9.96947
	model3	-2750.733101	172	p: 0.96417 0.03583 0.00000	w: 0.01177 0.66048 19.46243
	model7	-2760.62	169	p = 0.03982 q = 0.33431
	model8	-2749.73	171	p0 = 0.98132 p = 0.13020 q = 6.19613	(p1 = 0.01868) w = 1.00000
petD	model0	-2095.94	168	omega (dN/dS) = 0.02658
	model1	-2076.49	169	p: 0.96911 0.03089	w: 0.01844 1.00000
	model2	-2075.87	171	p: 0.96908 0.03092 0.00000	w: 0.01843 1.00000 27.70571
	model3	-2071.82	172	p: 0.86867 0.12354 0.00779	w: 0.00606 0.19019 2.35954
	model7	-2082.48	169	p = 0.03959 q = 0.30616
	model8	-2072.12	171	p0 = 0.99193 p = 0.04155 q = 0.38325	(p1 = 0.00001) w = 1.00000
petG	model0	-379.404	168	omega (dN/dS) = 0.05206
	model1	-379.049756	169	p: 0.96805 0.03195	w: 0.03580 1.00000
	model2	-379.801573	171	p: 0.96805 0.03195 0.00000	w: 0.03580 1.00000 34.79107
	model3	-378.129	172	p: 0.72802 0.27198 0.00000	w: 0.00000 0.17643 25.44261
	model7	-378.923	169	p = 0.04262 q = 0.32268
	model8	-378.171	171	p0 = 0.99999 p = 0.04194 q = 0.31575	(p1 = 0.00001) w = 2.32784
petL	model0	-638.704	168	omega (dN/dS) = 0.23285
	model1	-635.696	169	p: 0.81752 0.18248	w: 0.15171 1.00000
	model2	-635.696369	171	p: 0.81752 0.12455 0.05793	w: 0.15171 1.00000 1.00000
	model3	-633.846	172	p: 0.32659 0.67341 0.00000	w: 0.00000 0.38953 3.24336
	model7	-634.034	169	p = 0.55215 q = 1.43709
	model8	-634.034	171	p0 = 0.99999 p = 0.62156 q = 1.68823	(p1 = 0.00001) w = 1.00000
petN	model0	-448.652	168	omega (dN/dS) = 0.15506
	model1	-447.208	169	p: 0.95809 0.04191	w: 0.13481 1.00000
	model2	-448.138	171	p: 0.95809 0.00002 0.04189	w: 0.13481 1.00000 1.00000
	model3	-447.909	172	p: 0.85133 0.14867 0.00000	w: 0.10855 0.44466 10.22928
	model7	-447.208	169	p = 1.78249 q = 9.05538
	model8	-447.152	171	p0 = 0.97225 p = 4.35664 q = 26.07421	(p1 = 0.02775) w = 1.00000
psaA	model0	-9602.85	168	omega (dN/dS) = 0.04751
	model1	-9522.62	169	p: 0.97023 0.02977	w: 0.02566 1.00000
	model2	-9522.618193	171	p: 0.97023 0.02977 0.00000	w: 0.02566 1.00000 17.48919
	model3	-9520.534619	172	p: 0.95553 0.04447 0.00000	w: 0.02133 0.67068 30.63417
	model7	-9546.92	169	p = 0.03463 q = 0.23768
	model8	-9517.082012	171	p0 = 0.97998 p = 0.05279 q = 0.54347	(p1 = 0.02002) w = 1.04123	241 I 0.991**
psaB	model0	-9627.64	168	omega (dN/dS) = 0.03827
	model1	-9571.13	169	p: 0.96827 0.03173	w: 0.02198 1.00000
	model2	-9571.13	171	p: 0.96827 0.03173 0.00000	w: 0.02198 1.00000 12.63210
	model3	-9551.43	172	p: 0.90777 0.09223 0.00000	w: 0.00918 0.34812 109.59024
	model7	-9569.65	169	p = 0.04004 q = 0.30917
	model8	-9555.68	171	p0 = 0.98083 p = 0.04101 q = 0.37936	(p1 = 0.01917) w = 1.00000
psaC	model0	-1390.029048	168	omega (dN/dS) = 0.02103
	model1	-1381.99	169	p: 0.97361 0.02639	w: 0.01006 1.00000
	model2	-1381.985377	171	p: 0.97361 0.02639 0.00000	w: 0.02103 7.05132 24.03906
	model3	-1390.029053	172	p: 1.00000 0.00000 0.00000	w: 0.02103 7.05132 24.03906
	model7	-1378.3	169	p = 0.03829 q = 0.33157
	model8	-1372.36	170	p0 = 0.99999 p = 0.03809 q = 0.32902	(p1 = 0.00001) w = 2.26221
psaI	model0	-730.526	168	omega (dN/dS) = 0.36606
	model1	-722.057	169	p: 0.71613 0.28387	w: 0.16092 1.00000
	model2	-722.057	171	p: 0.71613 0.20656 0.07730	w: 0.16092 1.00000 1.00000
	model3	-722.05	172	p: 0.70755 0.29245 0.00000	w: 0.15656 0.96314 26.02008
	model7	-721.742	169	p = 0.33590 q = 0.55039
	model8	-721.742	171	p0 = 0.76482 p = 0.91857 q = 3.70889	(p1 = 0.2351) w = 1.00000
psaJ	model0	-593.844	168	omega (dN/dS) = 0.21502
	model1	-586.122	169	p: 0.67593 0.32407	w: 0.00000 1.00000
	model2	-586.122	171	p: 0.67593 0.30231 0.02176	w: 0.00000 1.00000 1.00000
	model3	-585.228	172	p: 0.64906 0.06964 0.28130	w: 0.00000 0.67685 0.67685
	model7	-585.248	169	p = 0.03601 q = 0.15471
	model8	-585.248	171	p0 = 0.67593 p = 0.00500 q = 12.89960	(p1 = 0.32407) w = 1.00000
psbA	model0	-4918.66	168	omega (dN/dS) = 0.01421
	model1	-4895.28	169	p: 0.98891 0.01109	w: 0.00737 1.00000
	model2	-4895.28	171	p: 0.98891 0.01109 0.00000	w: 0.00737 1.00000 3.31116
	model3	-4890.12	172	p: 0.9764 0.0236 0.00000	w: 0.00514 0.37012 145.98458
	model7	-4904.67	169	p = 0.04009 q = 0.46232
	model8	-4893.35	171	p0 = 0.99185 p = 0.04064 q = 0.62058	(p1 = 0.00815) w = 1.00000
psbB	model0	-7495.06	168	omega (dN/dS) = 0.04835
	model1	-7434.48	169	p: 0.95654 0.04346	w: 0.02408 1.00000
	model2	-7434.48	171	p: 0.95654 0.04346 0.00000	w: 0.02408 1.00000 23.53858
	model3	-7423.35	172	p: 0.90478 0.09522 0.00000	w: 0.01268 0.41952 35.55627
	model7	-7438.34	168	p = 0.03947 q = 0.27421
	model8	-7422.440660	171	p0 = 0.97866 p = 0.04025 q = 0.33464	(p1 = 0.02134) w = 1.00000
psbC	model0	-5867.85	168	omega (dN/dS) = 0.02561
	model1	-5851.48	169	p: 0.98048 0.01952	w: 0.01521 1.00000
	model2	-5851.48	171	p: 0.98049 0.01951 0.00000	w: 0.01521 1.00000 10.33284
	model3	-5842.49	172	p: 0.86557 0.12916 0.00528	w: 0.00000 0.17897 0.72268
	model7	-5851.01	169	p = 0.04032 q = 0.37064
	model8	-5846.65	171	p0 = 0.98895 p = 0.04004 q = 0.41954	(p1 = 0.01105) w = 1.00000
psbD	model0	-3986.72	168	omega (dN/dS) = 0.01103
	model1	-3978.78	169	p: 0.99323 0.00677	w: 0.00703 1.00000
	model2	-3978.78	171	p: 0.99323 0.00677 0.00000	w: 0.00703 1.00000 6.73622
	model3	-3976.37	172	p: 0.96732 0.03268 0.00000	w: 0.00313 0.25089 12.40390
	model7	-3981.51	169	p = 0.04028 q = 0.53492
	model8	-3977.82	171	p0 = 0.99408 p = 0.04307 q = 0.76530	(p1 = 0.00592) w = 1.00000
psbE	model0	-883.051	168	omega (dN/dS) = 0.05321
	model1	-872.676	169	p: 0.94784 0.05216	w: 0.01581 1.00000
	model2	-872.676	171	p: 0.94784 0.05216 0.00000	w: 0.01581 1.00000 11.73446
	model3	-871.73	172	p: 0.91156 0.08844 0.00000	w: 0.00810 0.54109 12.84305
	model7	-875.361	169	p = 0.03867 q = 0.25759
	model8	-872.771005	171	p0 = 0.94784 p = 0.03209 q = 0.30508	(p1 = 0.05216) w = 1.00000
psbF	model0	-430.743	168	omega (dN/dS) = 0.08412
	model1	-416.887	169	p: 0.96629 0.03371	w: 0.016152 1.00000
	model2	-415.648	171	p: 0.97317 0.00000 0.02683	w: 0.01895 1.00000 2.14896
	model3	-415.648	172	p: 0.97317 0.01847 0.00836	w: 0.01895 2.14896 2.14896
	model7	-423.494	169	p = 0.03653 q = 0.19478
	model8	-415.78	171	p0 = 0.97308 p = 0.07267 q = 1.30282	(p1 = 0.02692) w = 2.14512
psbH	model0	-1062.89	168	omega (dN/dS) = 0.09939
	model1	-1059.95	169	p: 0.98002 0.01998	w: 0.08549 1.00000
	model2	-1059.37	171	p: 0.98582 0.00000 0.01418	w: 0.08830 1.00000 2.13761
	model3	-1058.24	172	p: 0.35629 0.62990 0.01380	w: 0.00000 0.13889 2.15065
	model7	-1060.38	169	p = 0.54306 q = 4.18915
	model8	-1058.65	171	p0 = 0.98636 p = 0.85272 q = 7.89221	(p1 = 0.01364) w = 2.14770
psbI	model0	-575.567	168	omega (dN/dS) = 0.06694
	model1	-575.567	169	p: 0.99999 0.00001	w: 0.06694 1.00000
	model2	-575.567	171	p: 1.00000 0.00000 0.00000	w: 0.06694 1.00000 1.00000
	model3	-575.567	172	p: 1.00000 0.00000 0.00000	w: 0.06694 4.10272 4.64259
	model7	-574.258	169	p = 0.24394 q = 2.53366
	model8	-574.679	171	p0 = 0.99999 p = 0.24408 q = 2.55496	(p1 = 0.00001) w = 4.06131
psbJ	model0	-557.656	168	omega (dN/dS) = 0.13557
	model1	-547.423	169	p: 0.91793 0.08207	w: 0.06675 1.00000
	model2	-546.291	171	p: 0.93600 0.03579 0.02821	w: 0.07908 1.00000 2.84550
	model3	-546.451	172	p: 0.96614 0.03024 0.00362	w: 0.09184 2.63074 2.63074
	model7	-550.058	169	p = 0.22623 q = 1.01121
	model8	-544.712	171	p0 = 0.97053 p = 0.30414 q = 2.40749	(p1 = 0.02947) w = 2.81918
psbK	model0	-1196.84	168	omega (dN/dS) = 0.23276
	model1	-1165.83	169	p: 0.83065 0.16935	w: 0.08874 1.00000
	model2	-1162.02	171	p: 0.83081 0.13609 0.03310	w: 0.09817 1.00000 3.59389
	model3	-1158.47	172	p: 0.42543 0.50298 0.07159	w: 0.00000 0.27807 2.13754
	model7	-1167.08	169	p = 0.14668 q = 0.22581
	model8	-1159.29	171	p0 = 0.93014 p = 0.42405 q = 2.10616	(p1 = 0.06986) w = 2.16234	15 A 0.993**
psbL	model0	-366.824	168	omega (dN/dS) = 0.01557
	model1	-365.435	169	p: 0.97266 0.02734	w: 0.00561 1.00000
	model2	-365.435	171	p: 0.97266 0.02734 0.00000	w: 0.00561 1.00000 41.89997
	model3	-364.741	172	p: 0.92108 0.07892 0.00000	w: 0.00000 0.23010 12.33075
	model7	-365.736	169	p = 0.03937 q = 0.43093
	model8	-365.736	171	p0 = 0.99999 p = 0.03936 q = 0.43071	(p1 = 0.00001) w = 3.41762
psbM	model0	-349.365432	168	omega (dN/dS) = 0.02378
	model1	-346.798	169	p: 0.96849 0.03151	w: 0.00659 1.00000
	model2	-346.798	171	p: 0.96849 0.03151 0.00000	w: 0.00659 1.00000 3.32659
	model3	-345.831	172	p: 0.95753 0.04247 0.00000	w: 0.00537 0.39156 11.65803
	model7	-347.344	169	p = 0.03968 q = 0.37032
	model8	-347.345	171	p0 = 0.99999 p = 0.03936 q = 0.36560	(p1 = 0.00001) w = 4.56561
psbN	model0	-505.307	168	omega (dN/dS) = 0.16960
	model1	-502.03	169	p: 0.83333 0.16667	w: 0.06219 1.00000
	model2	-502.03	171	p: 0.83333 0.16667 0.00000	w: 0.06219 1.00000 7.98777
	model3	-501.382	172	p: 0.64023 0.35977 0.00000	w: 0.00000 0.53476 30.15639
	model7	-501.4	169	p = 0.12026 q = 0.48823
	model8	-501.4	171	p0 = 0.99999 p = 0.12025 q = 0.48822	(p1 = 0.00001) w = 1.00000
psbT	model0	-507.495	168	omega (dN/dS) = 0.03144
	model1	-507.341	169	p: 0.96142 0.03858	w: 0.01798 1.00000
	model2	-507.495	171	p: 1.00000 0.00000 0.00000	w: 0.03144 1.00000 6.95219
	model3	-503.751	172	p: 0.82742 0.17258 0.00000	w: 0.01355 0.19064 8.19621
	model7	-506.371	169	p = 0.03935 q = 0.31970
	model8	-504.511	171	p0 = 0.99999 p = 0.03940 q = 0.32027	(p1 = 0.00001) w = 2.22558
psbZ	model0	-821.402	168	omega (dN/dS) = 0.17031
	model1	-810.822	169	p: 0.86645 0.13355	w: 0.07150 1.00000
	model2	-810.822	171	p: 0.86645 0.04353 0.09002	w: 0.07150 1.00000 1.00000
	model3	-810.396	172	p: 0.80185 0.19815 0.00000	w: 0.04910 0.69291 19.39761
	model7	-810.887	169	p = 0.20424 q = 0.79512
	model8	-810.381	171	p0 = 0.91024 p = 0.01633 q = 0.08889	(p1 = 0.08976) w = 1.00000
rbcL	model0	-7877.14	168	omega (dN/dS) = 0.06667
	model1	-7555.36	169	p: 0.94468 0.05532	w: 0.00985 1.00000
	model2	-7538.24	171	p: 0.94509 0.04068 0.01423	w: 0.01063 1.00000 2.69196
	model3	-7518.05	172	p: 0.88440 0.09224 0.02335	w: 0.00077 0.25534 2.09603	95 T 1.000**	142 P 1.000**	225 I 1.000**	247 N 1.000**	251 I 1.000**	270 L 0.998**	282 R 1.000**	328 A 1.000**	371 I 1.000**
	model7	-7649.28	169	p = 0.08859 q = 0.33736
	model8	-7534.65	171	p0 = 0.96991 p = 0.03853 q = 0.37396	(p1 = 0.03009) w = 1.78049	225 I 1.000**	247 N 0.998**	251 I 0.999**	282 R 1.000**	328 A 0.999**	371 I 0.992**
rpl2	model0	-3463.08	168	omega (dN/dS) = 0.34743
	model1	-3391.16	169	p: 0.75700 0.24300	w: 0.07061 1.00000
	model2	-3381.6	171	p: 0.75199 0.21943 0.02858	w: 0.07885 1.00000 3.50257
	model3	-3381.59	172	p: 0.74578 0.22428 0.02994	w: 0.07643 0.96153 3.42944
	model7	-3394.64	169	p = 0.06152 q = 0.07919
	model8	-3383.1	171	p0 = 0.95116 p = 0.23936 q = 0.68560	(p1 = 0.04884) w = 2.84957	22 Y 0.995**	67 V 0.994**	121 S 0.994**
rpl14	model0	-2707.99	168	omega (dN/dS) = 0.22849
	model1	-2625.62	169	p: 0.76437 0.23563	w: 0.05642 1.00000
	model2	-2623.903911	171	p: 0.76229 0.21209 0.02561	w: 0.05897 1.00000 2.32710
	model3	-2617.62	172	p: 0.55668 0.34034 0.10297	w: 0.01043 0.32065 1.40947
	model7	-2625.12	169	p = 0.17577 q = 0.37395
	model8	-2617.66	171	p0 = 0.89853 p = 0.23415 q = 1.31020	(p1 = 0.10147) w = 1.41589
rpl16	model0	-2795.88	168	omega (dN/dS) = 1.24875
	model1	-2777.15	169	p: 0.40456 0.59544	w: 0.19829 1.00000
	model2	-2743.79	171	p: 0.24630 0.65001 0.10369	w: 0.17391 1.00000 5.05446	21 D 0.995**	52 R 0.998**	95 E 0.999**	98 I 1.000**	102 I 1.000**
	model3	-2740.25	172	p: 0.57309 0.37812 0.04879	w: 0.48511 2.09412 8.61064
	model7	-2777.5	169	p = 0.13617 q = 0.03524
	model8	-2743.923027	171	p0 = 0.89587 p = 0.09995 q = 0.02345	(p1 = 0.10413) w = 4.91311	21 D 0.998**	52 R 0.999**	95 E 0.999**	98 I 1.000**	102 I 1.000**
rpl20	model0	-3808.49	168	omega (dN/dS) = 0.43685
	model1	-3706.09	169	p: 0.56929 0.43071	w: 0.11040 1.00000
	model2	-3706.09	171	p: 0.56929 0.25721 0.17350	w: 0.11040 1.00000 1.00000
	model3	-3697.58	172	p: 0.37426 0.39112 0.23461	w: 0.03684 0.45742 1.31615
	model7	-3701.463312	169	p = 0.08051 q = 0.09490
	model8	-3696.1	171	p0 = 0.88312 p = 0.40331 q = 0.72183	(p1 = 0.11688) w = 1.63583
rpl22	model0	-4961.3	168	omega (dN/dS) = 0.31016
	model1	-4851.93	169	p: 0.64046 0.35954	w: 0.12072 1.00000
	model2	-4849.72	171	p: 0.62454 0.35619 0.01926	w: 0.11836 1.00000 0.42936
	model3	-4823.56	172	p: 0.11836 1.00000 2.43302	w: 0.03333 0.40554 1.21031
	model7	-4829.03	169	p = 0.38013 q = 0.63208
	model8	-4822.85	171	p0 = 0.91946 p = 0.46341 q = 1.31043	(p1 = 0.08054) w = 1.40937
rpl32	model0	-573.671	168	omega (dN/dS) = 1.00395
	model1	-569.985	169	p: 0.61738 0.38262	w: 0.35547 1.00000
	model2	-565.606	171	p: 0.76900 0.00000 0.23100	w: 0.57939 1.00000 2.56846
	model3	-565.606365	172	p: 0.00501 0.76399 0.23100	w: 0.57939 0.57939 2.56846
	model7	-570.801	169	p = 0.17017 q = 0.03913
	model8	-565.615	171	p0 = 0.76951 p = 98.15781 q = 70.81435	(p1 = 0.23049) w = 2.57356
rpl33	model0	-1083.55	168	omega (dN/dS) = 0.17968
	model1	-1055.07	169	p: 0.85029 0.14971	w: 0.06854 1.00000
	model2	-1054.4	171	p: 0.85053 0.13110 0.01837	w: 0.07207 1.00000 2.62943
	model3	-1054.94	172	p: 0.85614 0.14386 0.00000	w: 0.07273 1.12938 22.85596
	model7	-1059.36	169	p = 0.16501 q = 0.31589
	model8	-1054.28	171	p0 = 0.87705 p = 0.65908 q = 6.42317	(p1 = 0.12295) w = 1.25800
rpl36	model0	-734.902	168	omega (dN/dS) = 0.17898
	model1	-714.354167	169	p: 0.73046 0.26954	w: 0.03515 1.00000
	model2	-714.354	171	p: 0.73046 0.23622 0.03332	w: 0.03515 1.00000 1.00000
	model3	-713.435	172	p: 0.71504 0.28496 0.00000	w: 0.02888 0.72940 5.10064
	model7	-714.019	169	p = 0.17051 q = 0.49854
	model8	-714.019	171	p0 = 0.99999 p = 0.17052 q = 0.49856	(p1 = 0.00001) w = 1.01558
rpoA	model0	-9213.75	168	omega (dN/dS) = 0.36897
	model1	-8976.05	169	p: 0.69283 0.30717	w: 0.12856 1.00000
	model2	-8956.57	171	p: 0.67539 0.29168 0.03293	w: 0.13297 1.00000 2.97481	68 A 0.993**	146 R 0.997**	296 R 0.999**
	model3	-8946.89	172	p: 0.51485 0.38012 0.10503	w: 0.06622 0.53601 1.76922
	model7	-8970.38	169	p = 0.08022 q = 0.09693
	model8	-8943.81	171	p0 = 0.92821 p = 0.44942 q = 0.96365	(p1 = 0.07179) w = 2.03340	68 A 0.997**	146 R 0.999**	296 R 1.000**
rpoB	model0	-13457.6	168	omega (dN/dS) = 0.25198
	model1	-13201.4	169	p: 0.77506 0.22494	w: 0.10518 1.00000
	model2	-13196.3	171	p: 0.77167 0.21914 0.00919	w: 0.10698 1.00000 2.73784
	model3	-13165.3	172	p: 0.48799 0.42038 0.09163	w: 0.02621 0.34737 1.42128
	model7	-13194	169	p = 0.28363 q = 0.61191
	model8	-13165.5	171	p0 = 0.91607 p = 0.44445 q = 1.79333	(p1 = 0.08393) w = 1.45850	53 V 1.000**	86 V 0.997**	153 S 0.993**	161 A 0.999**	209 T 1.000**	238 N 0.998**	459 R 0.998**	613 L 1.000**
rpoC1	model0	-9197.67	168	omega (dN/dS) = 0.21332
	model1	-9015.73	169	p: 0.78436 0.21564	w: 0.08032 1.00000
	model2	-9010.81	171	p: 0.78222 0.21332 0.00446	w: 0.08088 1.00000 4.70901
	model3	-8990.68	172	p: 0.60626 0.32987 0.06386	w: 0.02739 0.40651 1.29463
	model7	-9003.23	169	p = 0.25320 q = 0.70179
	model8	-8990.4	171	p0 = 0.94143 p = 0.29879 q = 1.30109	(p1 = 0.05857) w = 1.33331	309 R 0.990**
rpoC2	model0	-30443.610471	168	omega (dN/dS) = 0.31253
	model1	-29908.556438	169	p: 0.67398 0.32602	w: 0.10240 1.00000
	model2	-29898.340410	171	p: 0.66823 0.31577 0.01599	w: 0.10363 1.00000 2.67671
	model3	-29839.316071	172	p: 0.51477 0.41588 0.06935	w: 0.04163 0.51809 1.62122
	model7	-29868.360781	169	p = 0.28603 q = 0.52039
	model8	-29837.509386	171	p0 = 0.95019 p = 0.37757 q = 0.94858	(p1 = 0.04981) w = 1.79700
rps2	model0	-5513.03	168	omega (dN/dS) = 0.40999
	model1	-5309.05	169	p: 0.73516 0.26484	w: 0.09779 1.00000
	model2	-5275.8	171	p: 0.70029 0.23858 0.06113	w: 0.10757 1.00000 3.18530	23 K 1.000**	66 M 1.000**
	model3	-5272.88	172	p: 0.53521 0.35545 0.10934	w: 0.04478 0.54471 2.40502
	model7	-5303.77	169	p = 0.06728 q = 0.08100
	model8	-5271.197603	171	p0 = 0.90828 p = 0.32763 q = 0.79709	(p1 = 0.09172) w = 2.60957	23 K 1.000**	66 M 1.000**	177 R 0.993**
rps3	model0	-6430.75	168	omega (dN/dS) = 0.35707
	model1	-6208.6	169	p: 0.70767 0.29233	w: 0.11814 1.00000
	model2	-6193.7	171	p: 0.69205 0.27421 0.03373	w: 0.12312 1.00000 2.78819	53 V 0.996**	76 P 1.000**
	model3	-6181.76	172	p: 0.43516 0.37791 0.18693	w: 0.04227 0.35181 1.47684
	model7	-6201.27	169	p = 0.07272 q = 0.08846
	model8	-6181.03	171	p0 = 0.82412 p = 0.57026 q = 2.11687	(p1 = 0.17588) w = 1.51336	53 V 0.998**	76 P 1.000**	120 D 0.993**
rps4	model0	-4387.46	168	omega (dN/dS) = 0.31997
	model1	-4212.99	169	p: 0.70608 0.29392	w: 0.04490 1.00000
	model2	-4193.96	171	p: 0.69128 0.27014 0.03858	w: 0.04449 1.00000 3.56937	29 W 1.000**	148 E 1.000**
	model3	-4190.27	172	p: 0.64936 0.29242 0.05822	w: 0.02768 0.69625 2.74864
	model7	-4210.32	169	p = 0.06135 q = 0.07923
	model8	-4190.23	171	p0 = 0.94388 p = 0.18114 q = 0.52093	(p1 = 0.05612) w = 2.78982	29 W 1.000**	32 P 0.992**	148 E 1.000**
rps7	model0	-2658.93	168	omega (dN/dS) = 1.43147
	model1	-2564.66	169	p: 0.62971 0.37029	w: 0.05829 1.00000
	model2	-2474.15	171	p: 0.44576 0.40682 0.14742	w: 0.02305 1.00000 7.56253	1 V 0.991**	13 S 1.000**	42 L 1.000**	63 Q 0.995**	66 R 1.000**	77 V 1.000**	80 L 1.000**	82 Q 0.999**	89 R 1.000**	91 T 0.996**	95 A 1.000**	109 P 1.000**	128 S 1.000**	148 F 0.997**
	model3	-2470.9	172	p: 0.71399 0.23569 0.05032	w: 0.26807 3.77494 15.47111
	model7	-2564.26	169	p = 0.05734 q = 0.06990
	model8	-2475.22	171	p0 = 0.84989 p = 0.06359 q = 0.07439	(p1 = 0.15011) w = 6.94268	1 V 0.993**	13 S 1.000**	42 L 1.000**	63 Q 0.996**	66 R 1.000**	77 V 1.000**	80 L 1.000**	82 Q 0.999**	89 R 1.000**	91 T 0.997**	95 A 1.000**	109 P 1.000**	128 S 1.000**	148 F 0.998**
rps8	model0	-2810.49	168	omega (dN/dS) = 1.24251
	model1	-2765.79	169	p: 0.35141 0.64859	w: 0.06668 1.00000
	model2	-2735.73	171	p: 0.24215 0.52090 0.23695	w: 0.00691 1.00000 3.49368	13 S 0.996**	34 S 0.998**	65 W 1.000**	79 N 0.998**	88 C 1.000**
	model3	-2735.55	172	p: 0.26342 0.52179 0.21480	w: 0.02647 1.10685 3.68688
	model7	-2765.82	169	p = 0.11540 q = 0.03401
	model8	-2735.614220	171	p0 = 0.76123 p = 0.09930 q = 0.03356	(p1 = 0.2387) w = 3.46340	13 S 0.998**	34 S 0.999**	65 W 1.000**	79 N 0.999**	88 C 1.000**	96 I 0.995**	106 G 0.991**
rps11	model0	-4193.261261	168	omega (dN/dS) = 0.51166
	model1	-4022.73	169	p: 0.67023 0.32977	w: 0.09474 1.00000
	model2	-3982.42	171	p: 0.62211 0.26609 0.11180	w: 0.09927 1.00000 3.18766	9 S 0.998**	10 A 1.000**	35 R 1.000**	52 T 0.996**	69 S 0.998**	81 A 0.995**	93 S 1.000**
	model3	-3979.45	172	p: 0.55531 0.32147 0.12322	w: 0.06585 0.71765 2.86048
	model7	-4016.69	169	p = 0.06406 q = 0.07585
	model8	-3978.28	171	p0 = 0.88053 p = 0.30032 q = 0.61054	(p1 = 0.11947) w = 2.88654	9 S 1.000**	10 A 1.000**	35 R 1.000**	52 T 0.999**	69 S 0.999**	81 A 0.998**	93 S 1.000**
rps12	model0	-693.746966	168	omega (dN/dS) = 0.22766
	model1	-675.138	169	p: 0.76759 0.23241	w: 0.04181 1.00000
	model2	-672.459	171	p: 0.75884 0.21519 0.02597	w: 0.04099 1.00000 5.34374
	model3	-670.263589	172	p: 0.68733 0.28621 0.02647	w: 0.01491 0.55247 4.54591
	model7	-674.733	169	p = 0.15563 q = 0.45932
	model8	-671.247	171	p0 = 0.97353 p = 0.15684 q = 0.63284	(p1 = 0.02647) w = 4.54810
rps14	model0	-2088.17	168	omega (dN/dS) = 0.39675
	model1	-2009.22	169	p: 0.76182 0.23818	w: 0.08109 1.00000
	model2	-1992.080064	171	p: 0.73781 0.20741 0.05477	w: 0.09180 1.00000 3.82479	35 R 1.000**	38 R 0.996**	61 V 0.982*	78 H 0.998**
	model3	-1991.98	172	p: 0.71255 0.23088 0.05657	w: 0.08014 0.88717 3.71654
	model7	-2008.96	169	p = 0.06235 q = 0.07685
	model8	-1991.64	171	p0 = 0.94295 p = 0.23253 q = 0.52645	(p1 = 0.05705) w = 3.70882	35 R 1.000**	38 R 0.999**	61 V 0.995**	78 H 0.999**
rps15	model0	-1541.85	168	omega (dN/dS) = 0.44063
	model1	-1492.08	169	p: 0.69459 0.30541	w: 0.08413 1.00000
	model2	-1487.07	171	p: 0.67789 0.23468 0.08743	w: 0.10091 1.00000 2.49913	54 R 0.999**
	model3	-1484.83	172	p: 0.71175 0.27661 0.01163	w: 0.11570 1.37252 6.24793
	model7	-1493.310753	169	p = 0.05081 q = 0.06013
	model8	-1488	171	p0 = 0.83871 p = 0.42911 q = 1.31473	(p1 = 0.16129) w = 2.11227	50 E 0.954**	54 R 1.000**
rps16	model0	-2032.08	168	omega (dN/dS) = 0.19063
	model1	-1999.5	169	p: 0.81131 0.18869	w: 0.10745 1.00000
	model2	-1999.5	171	p: 0.81131 0.12026 0.06843	w: 0.10745 1.00000 1.00000
	model3	-1990.376966	172	p: 0.28742 0.50805 0.20453	w: 0.00000 0.14529 0.64991
	model7	-1992.41	169	p = 0.38871 q = 1.19523
	model8	-1992.41	171	p0 = 0.99999 p = 0.38872 q = 1.19530	(p1 = 0.00001) w = 1.00000
rps18	model0	-2052.51	168	omega (dN/dS) = 0.49207
	model1	-1962.65	169	p: 0.58907 0.41093	w: 0.04583 1.00000
	model2	-1952.09	171	p: 0.58177 0.36943 0.04879	w: 0.04872 1.00000 3.79864	34 E 1.000**	73 E 0.992**
	model3	-1951.99	172	p: 0.58494 0.36856 0.04649	w: 0.05147 1.06792 3.99196
	model7	-1962.25	169	p = 0.05992 q = 0.07556
	model8	-1951.74	171	p0 = 0.94892 p = 0.06335 q = 0.08190	(p1 = 0.05108) w = 3.68536	34 E 0.999**	73 E 0.996**
rps19	model0	-2452.8	168	omega (dN/dS) = 0.17602
	model1	-2378.84	169	p: 0.77578 0.22422	w: 0.06695 1.00000
	model2	-2377.26	171	p: 0.76766 0.22091 0.01143	w: 0.06639 1.00000 3.13529
	model3	-2369.61	172	p: 0.70752 0.29248 0.00000	w: 0.03646 0.55474 39.54939
	model7	-2365.99	169	p = 0.26441 q = 0.80490
	model8	-2361.78	171	p0 = 0.97801 p = 0.22489 q = 1.03469	(p1 = 0.02199) w = 1.82003
ycf3	model0	-2339.62	168	omega (dN/dS) = 0.06411
	model1	-2336.55	169	p: 0.96406 0.03594	w: 0.05129 1.00000
	model2	-2336.55	171	p: 0.96406 0.03594 0.00000	w: 0.05129 1.00000 19.82370
	model3	-2324.72	172	p: 0.76506 0.23494 0.00000	w: 0.01332 0.24528 44.95414
	model7	-2325.07	169	p = 0.17219 q = 1.63934
	model8	-2325.07	171	p0 = 0.99999 p = 0.17219 q = 1.63933	(p1 = 0.00001) w = 3.02338
ycf4	model0	-3416.860935	168	omega (dN/dS) = 0.25657
	model1	-3380.05	169	p: 0.84986 0.15014	w: 0.15446 1.00000
	model2	-3378.6	171	p: 0.86549 0.11159 0.02291	w: 0.16743 1.00000 2.17786
	model3	-3362	172	p: 0.41012 0.55228 0.03760	w: 0.00733 0.37096 1.99778
	model7	-3372.99	169	p = 0.38284 q = 0.89200
	model8	-3364.59	171	p0 = 0.96573 p = 0.48172 q = 1.59341	(p1 = 0.03427) w = 2.06395
两颗星的标出来
除去ndH基因，ycf1和ycf2基因
