# Supplementary material for: Plastome evolution in the East Asian lobelias (Lobelioideae) using phylogenomic and comparative analyses
Source: Front Plant Sci. 2023 Mar 31;14:1144406. doi: 10.3389/fpls.2023.1144406 (PMC10102522; doi:10.3389/fpls.2023.1144406)
Supplement: Supplementary file 8 [file Table_7.xlsx]

## Sheet: Sheet1
Table S7 Likelihood ratio test (LRT) of the variable ω ratio under different models.
Gene	Model compared	df	LRT P-value
atpA	M0 vs M3	4	0.00374409
	M1 vs M2	2	0.0467625
	M7 vs M8	2	0.0155671
atpE	M0 vs M3	4	0.005529
	M1 vs M2	2	0.0134613
	M7 vs M8	2	0.00177757
atpF	M0 vs M3	4	0.009997
	M1 vs M2	2	0.0370848
	M7 vs M8	2	0.00148046
atpI	M0 vs M3	4	6.34e-05
	M1 vs M2	2	9.104e-06
	M7 vs M8	2	1e-09
cemA	M0 vs M3	4	1.784e-05
	M1 vs M2	2	3.41e-05
	M7 vs M8	2	0.020224
clpP	M0 vs M3	4	0.000421
	M1 vs M2	2	7.83e-05
	M7 vs M8	2	0.004393
matK	M0 vs M3	4	0.0412341
	M1 vs M2	2	0.001529
	M7 vs M8	2	0.0003629
psaA	M0 vs M3	4	0.0045499
	M1 vs M2	2	0.019998
	M7 vs M8	2	0.00128
psbK	M0 vs M3	4	0.000528
	M1 vs M2	2	0.0220921
	M7 vs M8	2	0.000412312
rbcL	M0 vs M3	4	0.00171965
	M1 vs M2	2	3.7e-08
	M7 vs M8	2	3.7784e-05
rpl2	M0 vs M3	4	0.0095342
	M1 vs M2	2	7.058e-05
	M7 vs M8	2	9.707e-06
rpl16	M0 vs M3	4	0.00083722
	M1 vs M2	2	4.3898e-05
	M7 vs M8	2	0.000348
rpoA	M0 vs M3	4	0
	M1 vs M2	2	3e-09
	M7 vs M8	2	7.45e-06
rpoB	M0 vs M3	4	0.004343
	M1 vs M2	2	0.00655011
	M7 vs M8	2	3.953e-05
rpoC1	M0 vs M3	4	0
	M1 vs M2	2	0.00727838
	M7 vs M8	2	2.672e-06
rps2	M0 vs M3	4	0.00053433
	M1 vs M2	2	0.00842521
	M7 vs M8	2	0.0343754
rps3	M0 vs M3	4	4.582e-05
	M1 vs M2	2	3.38e-07
	M7 vs M8	2	2e-09
rps4	M0 vs M3	4	0.0009823
	M1 vs M2	2	5e-09
	M7 vs M8	2	2e-09
rps7	M0 vs M3	4	0.0002488
	M1 vs M2	2	4.4e-06
	M7 vs M8	2	0.0006188
rps8	M0 vs M3	4	8.7e-06
	M1 vs M2	2	3.23e-05
	M7 vs M8	2	2e-06
rps11	M0 vs M3	4	3.23e-06
	M1 vs M2	2	1.247e-05
	M7 vs M8	2	0.00523466
rps14	M0 vs M3	4	3.41e-06
	M1 vs M2	2	3.6e-08
	M7 vs M8	2	3e-08
rps15	M0 vs M3	4	0.0008222
	M1 vs M2	2	0.00669291
	M7 vs M8	2	0.00492338
rps18	M0 vs M3	4	3.42e-05
	M1 vs M2	2	2.5978e-05
	M7 vs M8	2	2.7178e-05
